## CORRECTION

# Correction: Ontogenetic changes in limb posture, kinematics, forces and joint moments in American alligators (*Alligator mississippiensis*)

Masaya Iijima, V. David Munteanu, Ruth M. Elsey and Richard W. Blob

There was an error in *J. Exp. Biol.* (2021) **224**, jeb242990 (doi:10.1242/jeb.242990).

In the Materials and Methods, the term ‘SHL’ was incorrectly defined in the text of the following sentence:

‘The CoM was represented as a percentage of the shoulder–hip distance ( $\text{CoM}_{\text{SH}}$ ), using an equation:  $\text{CoM}_{\text{SH}} = 100[W_2 \times L / (W_1 + W_2) - \text{SSL}] / (\text{SHL} - \text{SSL})$ , where  $L$  is the length of the beam, SHL is the shoulder–hip length, SSL is the snout–shoulder length, and  $W_1$  and  $W_2$  are the masses recorded at the cranial and caudal balances, respectively.’

The definition of SHL should be ‘snout–hip length’. In all their analyses, the authors calculated the CoM using the correct values for snout–hip length.

Both the online full-text and PDF versions of the article have been updated. The authors apologise to readers for this error and any confusion it may have caused.
